# Supplementary material for: Structural characterization of α-amino acid complexes of molybdates: a spectroscopic and DFT study
Source: Royal Society of Chemistry journal article supplement (doi:10.1039/c4ra14236e), 2015-01-01
Supplement: c4ra14236e2.pdf [file c4ra14236e2.pdf]

# **Structural Characterization of $\alpha$ -Amino Acid Complexes of Molybdates: a Spectroscopic and DFT Study**

**Lorenzo Biancalana, Marco Bortoluzzi, Claudia Forte, Fabio Marchetti, Guido Pampaloni**

**SUPPORTING INFORMATION**

**Synthesis of  $\text{Mo}_2\text{O}_4(\text{OH})_4(\text{aaH})$  complexes: the influence of experimental parameters.** Compounds **1-6** were obtained under different experimental conditions as follows. The formation of identical products was checked by comparison of spectroscopic (IR,  $^{13}\text{C}$  CP-MAS NMR) and elemental analysis data (C, H, N, Mo).

**A) Formation of  $\text{Mo}_2\text{O}_4(\text{OH})_4(\text{GlyH})$ , **1**.**

**at pH = 0.** Compound  $\text{Na}_2\text{MoO}_4 \cdot 2\text{H}_2\text{O}$  (974 mg, 4.02 mmol) and glycine (153 mg, 2.03 mmol) were dissolved in 1 M  $\text{HNO}_3$  (35 mL). 65%  $\text{HNO}_3$  was added up to  $\text{pH} \approx 0$ . The resulting pale yellow mixture ( $c_{\text{Mo}} = 0.11$  M) was stirred at room temperature for 19 hours. Thus **1** was isolated (589 mg, 75%).

**at pH = 1.** Compound  $(\text{NH}_4)_2\text{MoO}_4$  (100 mg, 0.51 mmol) was dissolved in water (10 mL) and glycine (21 mg, 0.28 mmol) was dissolved in 1 M  $\text{HCl}$  (3 mL). The two solutions were mixed together and 6 M  $\text{HCl}$  was added dropwise until  $\text{pH} = 1$ . The resulting colourless solution ( $c_{\text{Mo}} = 36$  mM) was stirred at reflux temperature. After ca. 20 minutes **1** precipitated as a colourless solid (102 mg, 91%).

**B) Formation of  $\text{Mo}_2\text{O}_4(\text{OH})_4(\text{aaH})$  at different Mo/aaH molar ratios.** The following reactions were carried out by a procedure analogous to that described for the Mo/aaH 2:1 synthesis (Experimental Section), unless otherwise specified. Amino acid nitrates,  $[\text{aaH}_2]\text{NO}_3$ , were obtained from the filtered solution after complete solvent removal in vacuo.

**aaH = GlyH, Mo/aaH = 1:2, pH = 1.8.** From  $\text{Na}_2\text{MoO}_4 \cdot 2\text{H}_2\text{O}$  (271 mg, 1.12 mmol), glycine (169 mg, 2.25 mmol), water (30 mL), 1 M  $\text{HNO}_3$  (2.8 mL).  $\text{Mo}_2\text{O}_4(\text{OH})_4(\text{GlyH})$ , **1** (174 mg, 78%).  $[\text{GlyH}_2]\text{NO}_3$  (218 mg).

**aaH = GlyH, Mo/aaH = 1:13.7, pH = 1.8.** From  $\text{Na}_2\text{MoO}_4 \cdot 2\text{H}_2\text{O}$  (279 mg, 1.15 mmol), glycine (1.19 g, 15.8 mmol), water (92 mL), 1 M  $\text{HNO}_3$  (11.2 mL).  $\text{Mo}_2\text{O}_4(\text{OH})_4(\text{GlyH})$ , **1** (161 mg, 70%).  $[\text{GlyH}_2]\text{NO}_3$  (161 mg).

**aaH = PheH, Mo/aaH = 1:2, pH = 2.0.** From  $\text{Na}_2\text{MoO}_4 \cdot 2\text{H}_2\text{O}$  (415 mg, 1.71 mmol), L-phenylalanine (566 mg, 3.42 mmol), water (20 mL) and 1 M  $\text{HNO}_3$  (5.2 mL).  $\text{Mo}_2\text{O}_4(\text{OH})_4(\text{PheH})$ , **2** (349 mg, 84%).  $[\text{PheH}_2]\text{NO}_3$  (162 mg). **2** was also obtained by using  $(\text{NH}_4)_2\text{MoO}_4$  (ca. 1.5 mmol) in the place of  $\text{Na}_2\text{MoO}_4 \cdot 2\text{H}_2\text{O}$ , both at room temperature (97%, reaction time 2 hours) and at  $70^\circ\text{C}$  (99%, reaction time 1.5 hours).

**aaH = LeuH, Mo/aaH = 1:1, pH = 1.8.** From  $\text{Na}_2\text{MoO}_4 \cdot 2\text{H}_2\text{O}$  (358 mg, 1.48 mmol), L-leucine (195 mg, 1.48 mmol), water (20 mL) and 1 M  $\text{HNO}_3$  (3.5 mL). The mixture was stirred at  $50^\circ\text{C}$  for 3.5 hours and then at room temperature for 3 days: no solid formed under these conditions. Then the mixture was concentrated to 14 mL in vacuo, thus allowing the precipitation of **3** (249 mg, 74%).

**aaH = LeuH, Mo/aaH = 1:2, pH = 1.8.** From  $\text{Na}_2\text{MoO}_4 \cdot 2\text{H}_2\text{O}$  (358 mg, 1.48 mmol), L-leucine (388 mg, 2.96 mmol), water (20 mL) and 1 M  $\text{HNO}_3$  (5 mL). The mixture was heated at  $50^\circ\text{C}$  and complex **3** formed after 3.5 hours (312 mg, 93%).  $[\text{LeuH}_2]\text{NO}_3$  (312 mg).

**aaH = MetH, Mo/aaH = 1:2, pH = 2.0.** From  $(\text{NH}_4)_2\text{MoO}_4$  (301 mg, 1.53 mmol), L-methionine (458 mg, 3.07 mmol), water (40 mL) and 3 M  $\text{HNO}_3$  (few drops).  $\text{Mo}_2\text{O}_4(\text{OH})_4(\text{MetH})$ , **4**: yield 269 mg, 74%. Some unreacted excess methionine was isolated from the liquors.

**aaH = ProH, Mo/aaH = 1:2.** From  $(\text{NH}_4)_2\text{MoO}_4$  (307 mg, 1.57 mmol), L-proline (361 mg, 3.13 mmol), water (80 mL) and 3 M  $\text{HNO}_3$  (few drops).  $\text{Mo}_2\text{O}_4(\text{OH})_4(\text{MetH})$ , **5** (233 mg, 68%).

**C) Influence of pH variations on the formation of **1** and **4**.** A suspension of **1** (434 mg, 1.09 mmol) in water (20 mL,  $\text{pH} \approx 3$ ) was treated with 0.194 M  $\text{NaOH}$  (8.10 mL, 1.57 mmol) up to complete dissolution of the solid ( $\text{pH} = 4.83$ ). Further  $\text{NaOH}$  (11.1 mL, 2.15 mmol) was added up to  $\text{pH} = 5.31$ . Afterwards 1.08 M  $\text{HNO}_3$  (2.05 mL, 2.22 mmol) was added dropwise, thus compound **1** was recovered (yield 411 mg, 95% with respect to the initial amount). A similar behaviour was observed with compound **4**.

**Table S1.** Formation of **1** in variable experimental conditions with pH monitoring.

| Entry <sup>a</sup> | Mo/GlyH molar ratio | $c_{\text{Mo}} / 10^{-2} \text{ M}^b$ | Induction period <sup>c</sup> | pH change interval <sup>d</sup> | Lowest pH | Final pH | Yield |
|--------------------|---------------------|---------------------------------------|-------------------------------|---------------------------------|-----------|----------|-------|
| #1                 | 1.0                 | 5.0                                   | 15 min                        | 57 min                          | 2.05      | 2.17     | 84%   |
| #2                 | 1.6                 | 1.0                                   | 22 min                        | 96 min                          | 2.08      | 2.48     | 88%   |
| #3                 | 2.0                 | 6.7                                   | 39 min                        | 93 min                          | 2.08      | 2.36     | 87%   |

a 1.08 M  $\text{HNO}_3$  was prepared from 67%  $\text{HNO}_3$ . Reactions #1-#3 were carried out by mixing appropriate amounts of GlyH (100-150 mg),  $\text{Na}_2\text{MoO}_4 \cdot 2\text{H}_2\text{O}$  (600-800 mg) and water (*ca.* 30 mL), then 1.08  $\text{HNO}_3$  was added until pH = 2 (4-5 mL).

b Initial molar concentration of molybdenum in the reaction mixture.

c period of time during which the pH remained almost constant. For the definition of induction period, see A. D. McNaught and A. Wilkinson in *Compendium of Chemical Terminology - the "Gold Book"*. 2nd ed., IUPAC, Oxford, 1997.

d period of time during which the pH increased

**Graph S1.** Profile of pH vs. time for the reaction reported as entry #2 in Table S1.

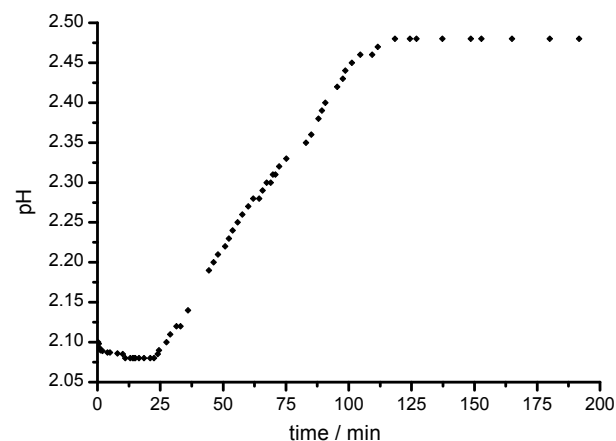

**Graph S2.** Titration of an aqueous mixture of Na<sub>2</sub>MoO<sub>4</sub> and GlyH (2:1 molar ratio) with 1.08 M HNO<sub>3</sub>. Filled squares refer to pH values measured soon after each HNO<sub>3</sub> addition. Empty circles refer to final pH values measured after the formation of **1**.

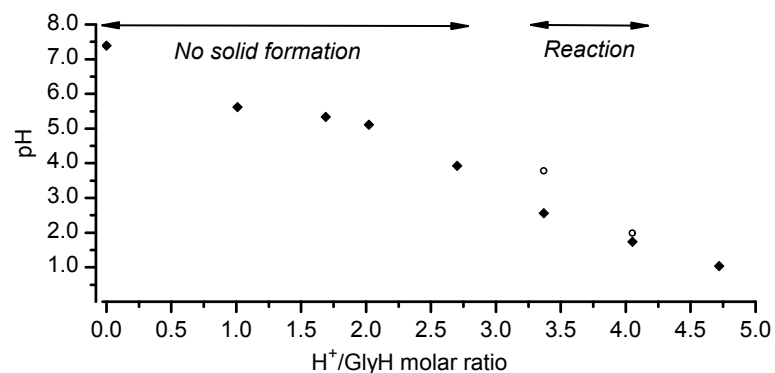

pH values did not vary after addition, up to H<sup>+</sup>/GlyH = 2.70 (in this case, pH = 3.93 did not vary after 15 hours). With H<sup>+</sup>/GlyH = 3.37, pH quickly reached 2.55 and it began to increase after ca. 30 minutes with the formation of a colourless solid. The final value of pH = 3.93 was reached. When H<sup>+</sup>/GlyH was raised to 4.05, a small increase in pH was still detected, thus indicating residual formation of **1**.

**Calculation of  $v_{H^+}$ :** The amount of HNO<sub>3</sub> added and the pH of the solution after the second and final reaction are known (the “end of reaction” corresponds to the empty circle for H<sup>+</sup>/GlyH = 4.05 in Graph S2, when pH stopped increasing). Therefore, the moles of H<sup>+</sup> reacted ( $\Delta n_{H^+}$ ) can be calculated by Equation S1. By knowing the amount of product isolated ( $m$ ) and its molar mass ( $M$ ), the molar ratio between  $\Delta n_{H^+}$  and Mo<sub>2</sub>O<sub>4</sub>(OH)<sub>4</sub>(GlyH) is given by Equation S2.

$$\Delta n_{H^+} = V_{HNO_3} \times c_{HNO_3} - V \times 10^{-pH} \quad (\text{Equation S1})$$

$\Delta n_{H^+}$  = reacted moles of H<sup>+</sup>

$V_{HNO_3}$ ,  $c_{HNO_3}$  = volume and molar concentration of the HNO<sub>3</sub> solution

$V$  = final volume of the solution, assuming that volumes are additive ( $V = V_0 + V_{HNO_3}$ )

$$v_{H^+} = \Delta n_{H^+} \times M / m \quad (\text{Equation S2})$$

$v_{H^+}$  = molar ratio between  $\Delta n_{H^+}$  and Mo<sub>2</sub>O<sub>4</sub>(OH)<sub>4</sub>(GlyH)

$m$  = amount of solid Mo<sub>2</sub>O<sub>4</sub>(OH)<sub>4</sub>(GlyH) isolated

$M$  = molar mass of Mo<sub>2</sub>O<sub>4</sub>(OH)<sub>4</sub>(GlyH)

The value obtained for the  $v_{H^+}$  coefficient is 4.43, which is very close to the stoichiometric coefficient of H<sup>+</sup> required for the formation reaction proposed (see Equation 1). The value of  $\Delta n_{H^+}$  obtained with equation S2 is inevitably overestimated since it does not consider any possible equilibrium, established after the formation of **1**, which may involve H<sup>+</sup>, reducing its concentration. Examples are the protonation of unreacted glycine or molybdate. Nevertheless, since the formation of **1** was almost quantitative (88% yield) and the reaction was carried out under stoichiometric conditions, the value of  $\Delta n_{H^+}$  may be not too biased.

**Table S2.** Compared  $^{13}\text{C}$  CP-MAS chemical shifts (ppm) of aaH, [aaH<sub>2</sub>] $\text{NO}_3$  and  $\text{Mo}_2\text{O}_4(\text{OH})_4(\text{aaH})$ .<sup>a</sup>

| $\alpha$ -Amino Acid                                                                | Compound                                                       | CO                  | $\text{C}_\alpha$ | $\text{C}_\beta$ | $\text{C}_\gamma$              | $\text{C}_\delta$ or Ph                            | Ref.      |
|-------------------------------------------------------------------------------------|----------------------------------------------------------------|---------------------|-------------------|------------------|--------------------------------|----------------------------------------------------|-----------|
| 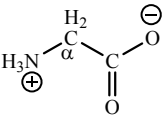   | GlyH                                                           | 176.2               | 43.5              |                  |                                |                                                    | <b>b</b>  |
|                                                                                     | [GlyH <sub>2</sub> ] $\text{NO}_3$                             | 171.7               | 41.1              |                  |                                |                                                    | This work |
|                                                                                     | $\text{Mo}_2\text{O}_4(\text{OH})_4(\text{GlyH})$ , <b>1</b>   | 172.0               | 41.3              |                  |                                |                                                    | This work |
|    | PheH                                                           | 175.3               | 58.3, 56.4        | 40.4, 37.6       |                                | 135.4, 130.1, 128.4                                | This work |
|                                                                                     | [PheH <sub>2</sub> ] $\text{NO}_3$                             | 173.9, 173.2        | 56.3, 55.5        | 37.0, 36.3       |                                | 135.2, 132.8, 132.3, 129.8,<br>129.3, 127.6, 127.3 |           |
|                                                                                     | $\text{Mo}_2\text{O}_4(\text{OH})_4(\text{PheH})$ , <b>2</b>   | 172.6               | 57.3              | 35.6             |                                | 134.5, 133.6, 132.5, 129.6                         |           |
|    | LeuH                                                           | 176.7, 175.8        | 53.8, 52.7        | 42.4, 40.6       | 24.6                           | 24.6                                               | This work |
|                                                                                     | [LeuH <sub>2</sub> ] $\text{NO}_3$                             | 173.9, 173.1        | 52.9              | 39.2             | 24.7                           | 23.3, 22.3, 21.7, 20.0                             |           |
|                                                                                     | $\text{Mo}_2\text{O}_4(\text{OH})_4(\text{LeuH})$ , <b>3</b>   | 173.2               | 53.2              | 39.2             | 25.1                           | 21.3, 20.1                                         |           |
|   | MetH                                                           | 176.7               | 55.2, 52.1        | 32.9, 32.0       | 31.0                           | 17.3, 15.3                                         | This work |
|                                                                                     | [MetH <sub>2</sub> ] $\text{NO}_3$                             | 173.7, 172.2        | 54.6, 54.4        | 32.9             | 30.2                           | 16.0, 15.5                                         |           |
|                                                                                     | $\text{Mo}_2\text{O}_4(\text{OH})_4(\text{MetH})$ , <b>4</b>   | 174.4, 171.8        | 54.7              | 31.5, 30.4       | 28.7                           | 15.3, 14.3, 12.4                                   |           |
|  | ProH                                                           | 176.7               | 60.6              | 29.6             | 25.1                           | 47.8                                               | This work |
|                                                                                     | $\text{Mo}_2\text{O}_4(\text{OH})_4(\text{ProH})$ , <b>5</b>   | 176.8, 175.2, 173.5 | 65.0, 61.0        | 30.2, 29.4       | 26.2, 25.8, 23.7               | 49.7, 47.3, 46.9                                   |           |
|  | dmPheH                                                         | 172.6               | 66.5              | 35.4             | 39.0 (NCH <sub>3</sub> )       | 139.0, 130.6, 129.1, 127.7, 125.1                  | This work |
|                                                                                     | $\text{Mo}_2\text{O}_4(\text{OH})_4(\text{dmPheH})$ , <b>6</b> | 171.6               | 69.9              | 30.4             | 42.0, 36.6 (NCH <sub>3</sub> ) | 140.9, 130.8, 128.8, 127.8                         |           |

<sup>a</sup> Split signals for PheH, [PheH<sub>2</sub>] $\text{NO}_3$ , LeuH, [LeuH<sub>2</sub>] $\text{NO}_3$ , MetH, [MetH<sub>2</sub>] $\text{NO}_3$  are due to the presence of two crystallographically independent molecules in the asymmetric unit.

<sup>b</sup> C. Gervais, R. Dupree, K. J. Pike, C. Bonhomme, M. Profeta, C. J. Pickard and F. Mauri, *J. Phys. Chem. A*, 2005, **109**, 6960-6969

**Table S3.** Main solid state IR absorptions (cm<sup>-1</sup>) and vibrational assignments for compounds **1-6** and the related  $\alpha$ -amino acids.

| $\alpha$ -Amino Acid | Compound                                                            | Carboxylate group           |                            |                                                  | Ammonium group                 |                               | Mo-O backbone             |                            |                                   |                                                                    |                                  | Ref.      |
|----------------------|---------------------------------------------------------------------|-----------------------------|----------------------------|--------------------------------------------------|--------------------------------|-------------------------------|---------------------------|----------------------------|-----------------------------------|--------------------------------------------------------------------|----------------------------------|-----------|
|                      |                                                                     | $\nu_{asym}(\text{CO}_2^-)$ | $\nu_{sym}(\text{CO}_2^-)$ | $\Delta\nu_{a-s}$<br>( $\Delta\nu_{rel}^{a-s}$ ) | $\delta_{asym}(\text{NH}_3^+)$ | $\delta_{sym}(\text{NH}_3^+)$ | $\nu_{sym}(\text{MoO}_2)$ | $\nu_{asym}(\text{MoO}_2)$ | $\nu_{asym}(\text{Mo}_2\text{O})$ | $\nu(\text{Mo-O}_{ligand})$ or/and<br>$\nu(\text{Mo}_2\text{O}_2)$ | $\nu_{sym}(\text{Mo}_2\text{O})$ |           |
|                      | GlyH                                                                | 1610                        | 1407                       | 203                                              | 1580                           | 1500                          |                           |                            |                                   |                                                                    |                                  | a         |
|                      | Mo <sub>2</sub> O <sub>4</sub> (OH) <sub>4</sub> (GlyH), <b>1</b>   | 1623                        | 1412                       | 211 (+8)                                         | 1590                           | 1512                          | 946                       | 918, 903                   | 761                               | 531                                                                | 473                              | This work |
|                      | PheH                                                                | 1556                        | 1408                       | 148                                              | 1622                           | 1494                          |                           |                            |                                   |                                                                    |                                  | b         |
|                      | Mo <sub>2</sub> O <sub>4</sub> (OH) <sub>4</sub> (PheH), <b>2</b>   | 1607                        | 1426                       | 181 (+33)                                        | 1607                           | 1525                          | 942                       | 913, 904                   | 756                               | 534                                                                |                                  | This work |
|                      | LeuH                                                                | 1578                        | 1406                       | 172                                              | 1608                           | 1512                          |                           |                            |                                   |                                                                    |                                  | c         |
|                      | Mo <sub>2</sub> O <sub>4</sub> (OH) <sub>4</sub> (LeuH), <b>3</b>   | 1599                        | 1428                       | 171 (-1)                                         | 1620                           | 1513                          | 939                       | 909, 896                   | 768                               | 537                                                                | 479                              | This work |
|                      | MetH                                                                | 1582, 1560                  | 1406                       | 165 (av.)                                        | 1608                           | 1508                          |                           |                            |                                   |                                                                    |                                  | d         |
|                      | Mo <sub>2</sub> O <sub>4</sub> (OH) <sub>4</sub> (MetH), <b>4</b>   | 1575                        | 1427                       | 148 (-17)                                        | 1603                           | 1504                          | 942                       | 913, 894                   | 762                               | 540                                                                | 486                              | This work |
|                      | ProH                                                                | 1613                        | 1404                       | 209                                              | $\delta(\text{NH}_2^+)$ : 1553 |                               |                           |                            |                                   |                                                                    |                                  | e         |
|                      | Mo <sub>2</sub> O <sub>4</sub> (OH) <sub>4</sub> (ProH), <b>5</b>   | 1603                        | 1432                       | 171 (-38)                                        | $\delta(\text{NH}_2^+)$ : 1558 |                               | 944                       | 914, 901                   | 767                               | 543                                                                | 463                              | This work |
|                      | dmPheH                                                              | 1610                        | 1416                       | 194                                              | $\nu(\text{N-CH}_3)$ : 1485    |                               |                           |                            |                                   |                                                                    |                                  | This work |
|                      | Mo <sub>2</sub> O <sub>4</sub> (OH) <sub>4</sub> (dmPheH), <b>6</b> | 1626                        | 1412                       | 214 (+20)                                        | $\nu(\text{N-CH}_3)$ : 1495    |                               | 946                       | 916, 901                   | 769                               | 547                                                                | 484                              |           |

IR spectra of  $\alpha$ -amino acids were recorded by FT-IR; the following references assisted with band assignments: (a) M. Tsuboi, T. Onishi, T. S. Nakagawa and S. I. Mizushima, *Spectrochim. Acta* 1958, **12**, 253-261; (b) S. Olsztynska, M. Komorowska, L. Vrielynck and N. Dupuy, *Appl. Spectrosc.*, 2001, **55**, 901-907; (c) J. F. Jackovitz and J. L. Walter, *Spectrochim. Acta*, 1966, **22**, 1393-1406; (d) A. Grunenber and D. Bougeard, *J. Mol. Struct.*, 1987, **160**, 27-36; (e) C. C. Wagner, M. H. Torre and E. J. Baran, *Lat. Am. J. Pharm.*, 2008, **27**, 197-202.

**Figure S1.** Solid state IR spectrum of  $\text{Mo}_2\text{O}_4(\text{OH})_4(\text{GlyH})$ , **1**.

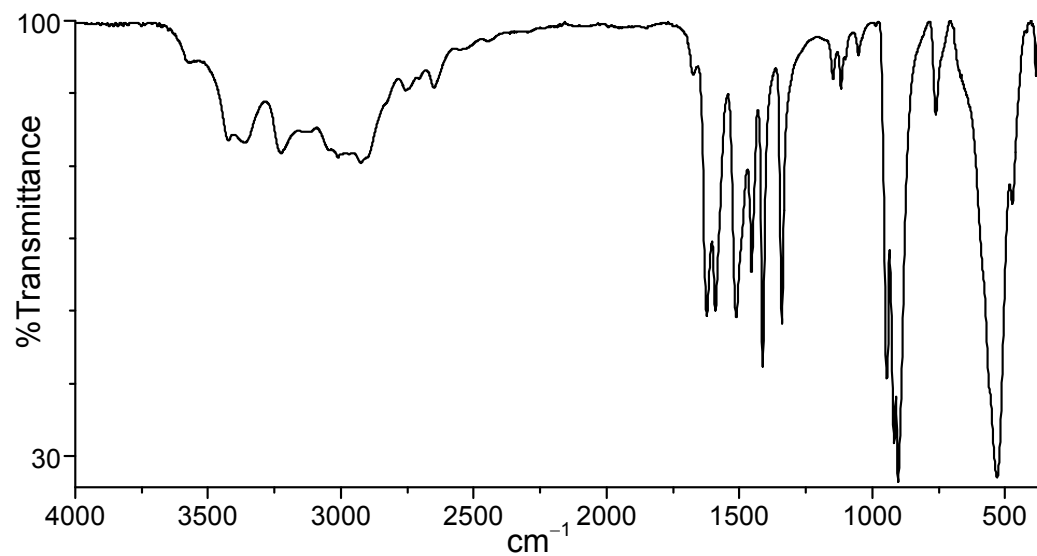

**Figure S2.** Solid state IR spectrum of  $\text{Mo}_2\text{O}_4(\text{OH})_4(\text{PheH})$ , **2**.

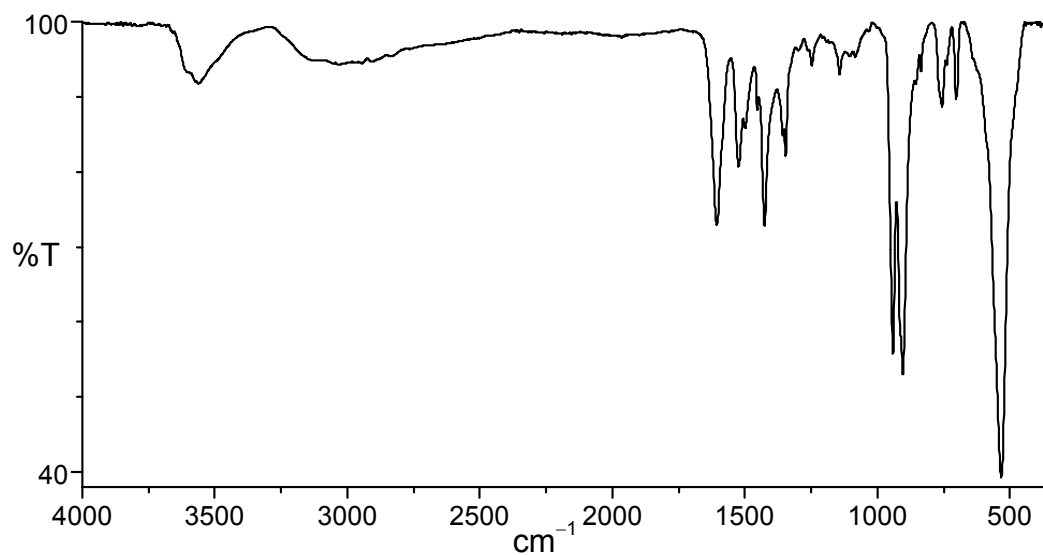

**Figure S3.** Solid state IR spectrum of  $\text{Mo}_2\text{O}_4(\text{OH})_4(\text{LeuH})$ , **3**.

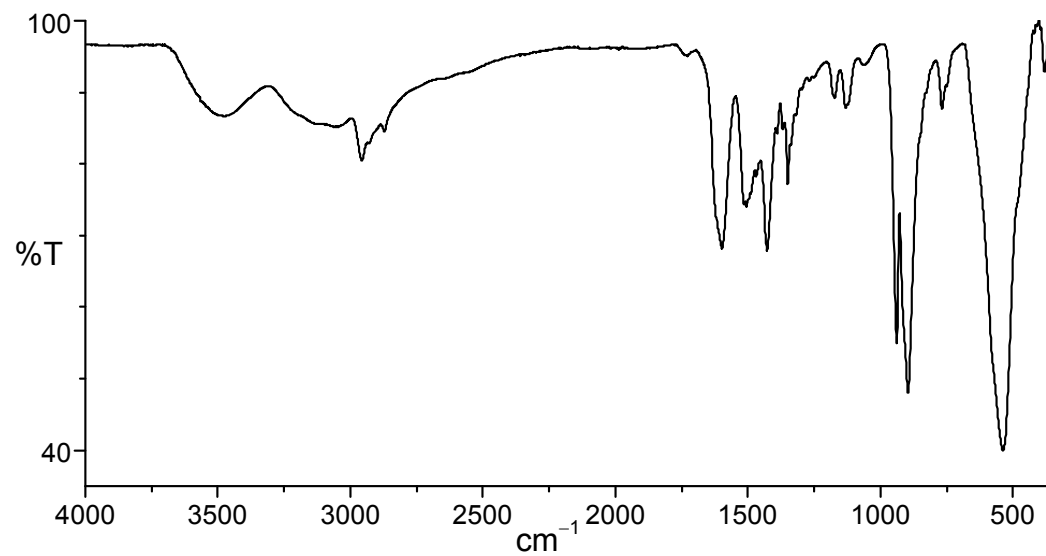

**Figure S4.** Solid state IR spectrum of  $\text{Mo}_2\text{O}_4(\text{OH})_4(\text{MetH})$ , **4**.

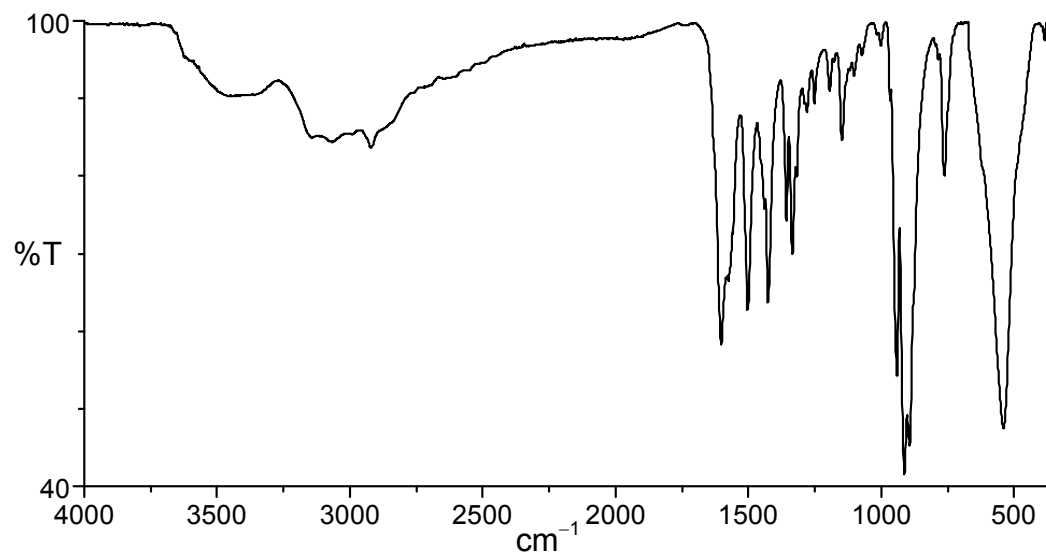

**Figure S5.** Solid state IR spectrum of  $\text{Mo}_2\text{O}_4(\text{OH})_4(\text{ProH})$ , **5**.

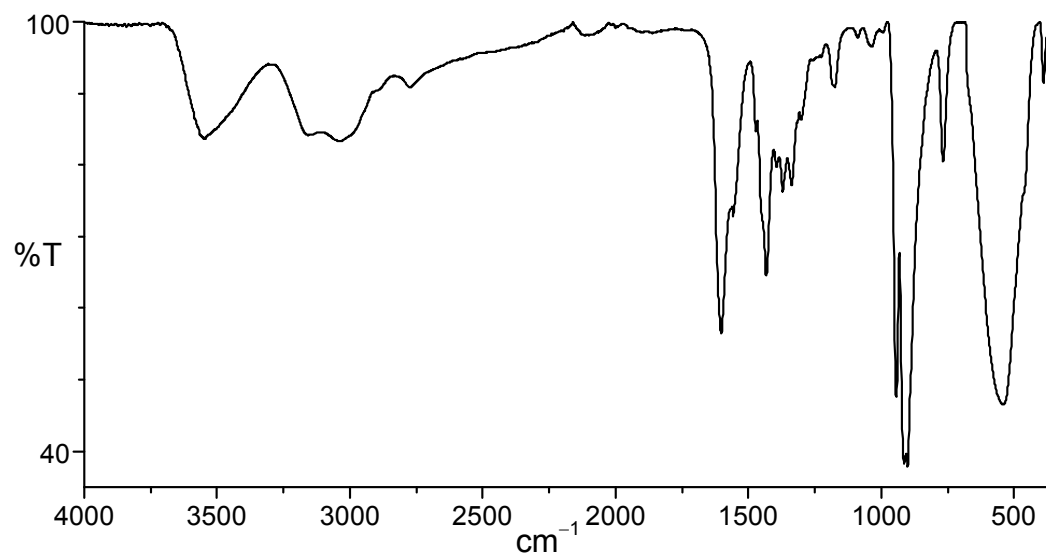

**Figure S6.** Solid state IR spectrum of  $\text{Mo}_2\text{O}_4(\text{OH})_4(\text{dmPheH})$ , **6**.

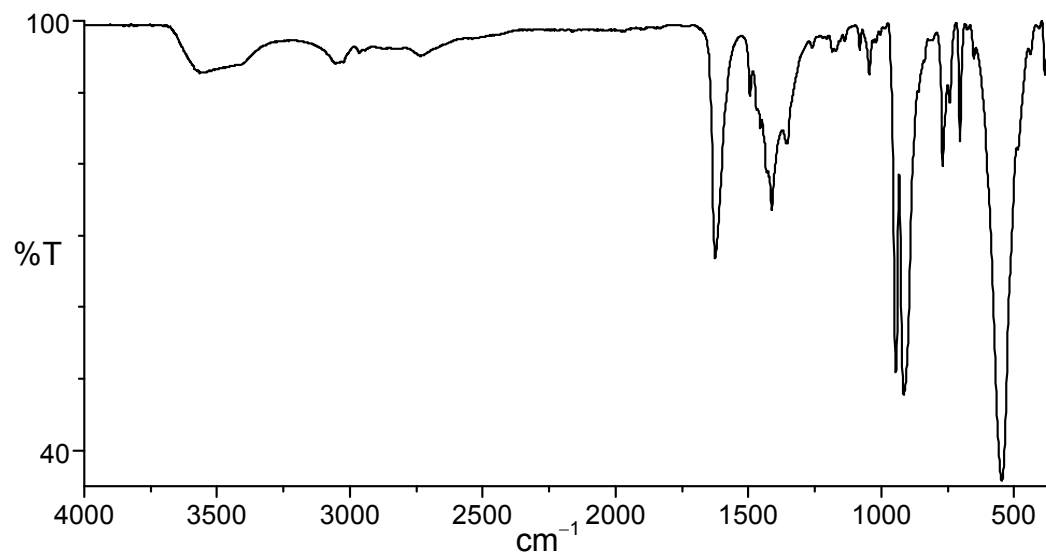

**Figure. S7.** Comparison of  $\text{Mo}_2\text{O}_4(\text{OH})_4(\text{aaH})$  (straight line) and  $[\text{aaH}_2]\text{NO}_3$  (dashed line) IR spectra in the  $2300\text{--}3400\text{ cm}^{-1}$  interval for glycine (a), L-phenylalanine (b), L-leucine (c) and L-methionine (d).

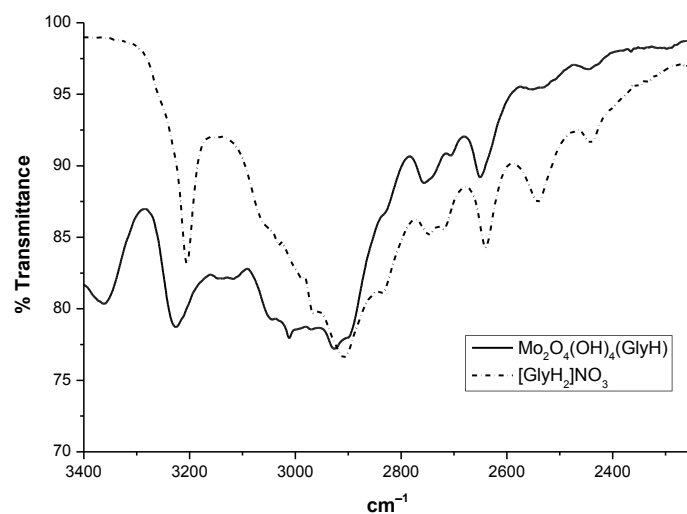

(a)

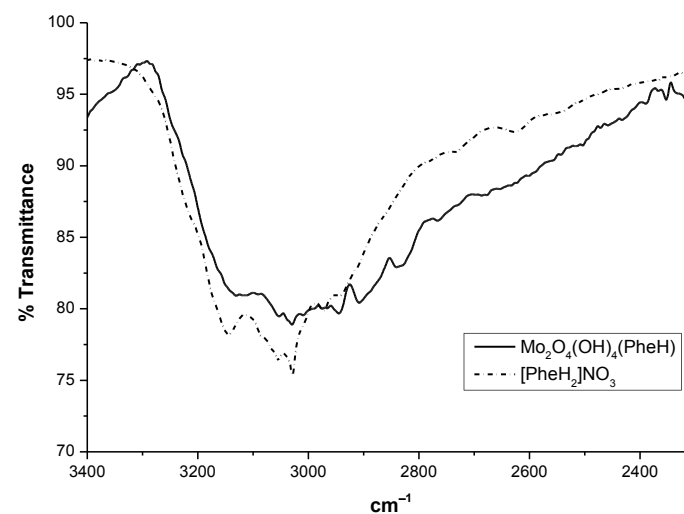

(b)

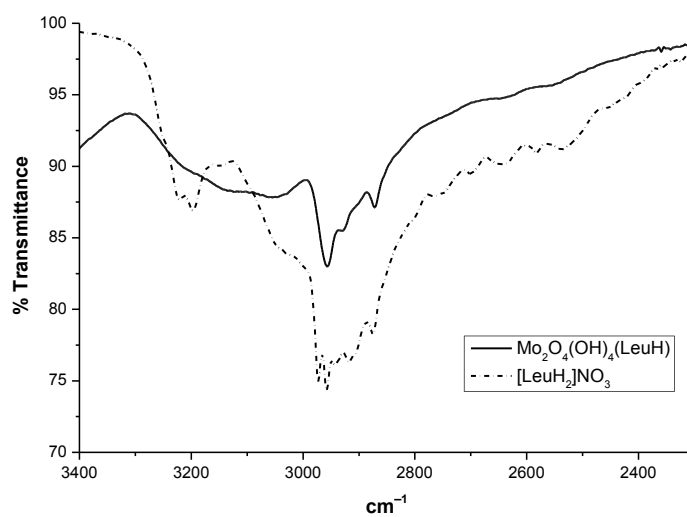

(c)

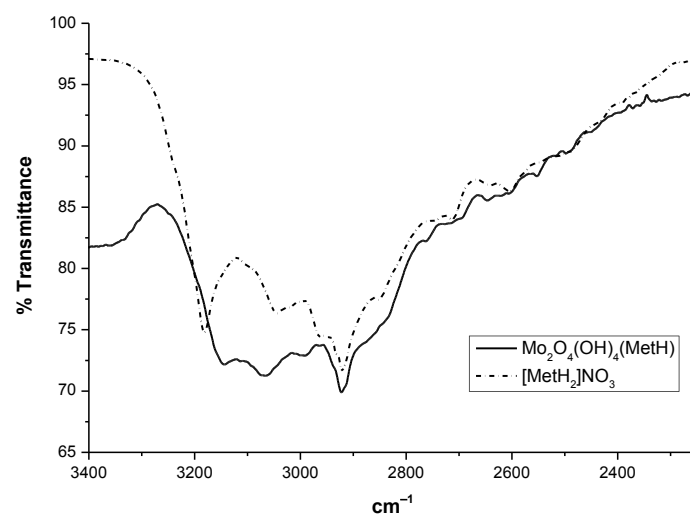

(d)
